# Supplementary material for: Does a ketogenic diet as an adjuvant therapy for drug treatment enhance chemotherapy sensitivity and reduce target lesions in patients with locally recurrent or metastatic Her-2-negative breast cancer? Study protocol for a randomized controlled trial
Source: Springer Nature journal article supplement (doi:10.1186/s13063-020-04429-5), 2020-06-05
Supplement: MOESM2 [file 18054618]

**The Ethics Committee of the Cancer Hospital of China Medical University  
Ethical Approval Form  
Approval number: 20170234**

|                                    |                                                                                                                                                                                                                                                                                                               |                                   |                                                                                                                      |
|------------------------------------|---------------------------------------------------------------------------------------------------------------------------------------------------------------------------------------------------------------------------------------------------------------------------------------------------------------|-----------------------------------|----------------------------------------------------------------------------------------------------------------------|
| <b>Project Title</b>               | Does ketogenic diet as an adjuvant therapy for drug treatment enhance chemotherapy sensitivity and reduce target lesions in patients with locally recurrent or metastatic Her-2 negative breast cancer? Study protocol for a randomized controlled trial<br>Version: 1.1                      Date: 2017-2-24 |                                   |                                                                                                                      |
| <b>Affiliation of Application</b>  | Cancer Hospital of China Medical University                                                                                                                                                                                                                                                                   | <b>Clinical Trial Affiliation</b> | Cancer Hospital of China Medical University                                                                          |
| <b>Principal Investigator</b>      | Tao Sun                                                                                                                                                                                                                                                                                                       | <b>Department of Project</b>      | The First Internal Medicine                                                                                          |
| <b>Review Date</b>                 | 2017.3.1                                                                                                                                                                                                                                                                                                      | <b>Review Address</b>             | Medical Ethics Committee of Cancer Hospital of China Medical University                                              |
| <b>Review Type</b>                 | <input type="checkbox"/> Meeting Review <input checked="" type="checkbox"/> Quick Review                                                                                                                                                                                                                      |                                   |                                                                                                                      |
| <b>Documents for review</b>        | Consent form      Version 1.1<br>Protocol              Version 1.1                                                                                                                                                                                                                                            |                                   |                                                                                                                      |
| <b>Review Comments</b>             | The Ethics Committee has carefully reviewed the related content and approved the study to proceed under the current protocol.                                                                                                                                                                                 |                                   |                                                                                                                      |
| <b>Other Comments</b>              | None                                                                                                                                                                                                                                                                                                          |                                   |                                                                                                                      |
| <b>Expiration Date of Document</b> | 2017.3.1-2022.12.28                                                                                                                                                                                                                                                                                           | <b>Frequency of Review</b>        | <input type="checkbox"/> 3 months <input type="checkbox"/> 6 months<br><input checked="" type="checkbox"/> 12 months |
| <b>Decision</b>                    | Approved<br><br>The Ethics Committee of the Cancer Hospital of China Medical University (Seal)<br>Signature: Haozhe Piao<br><br>Mar. 1, 2017                                                                                                                                                                  |                                   |                                                                                                                      |

**Note: The responsibility, staff, effect, procedure and record of the Ethics Committee conforms to ICH-GCP and related regulations of China.**

1. **Clinical Investigator:** Tao Sun (Signature)      Date: Mar. 1, 2017

辽宁省肿瘤医院医学伦理委员会批件

辽宁省肿瘤医院医学伦理委员会审查批件

伦理批件编号：20170234

|         |                                                                                                                                                                                                                   |        |                                                                                                       |
|---------|-------------------------------------------------------------------------------------------------------------------------------------------------------------------------------------------------------------------|--------|-------------------------------------------------------------------------------------------------------|
| 项目名称及编号 | 生酮饮食辅助药物治疗能促进局部复发或转移性 Her-2 阴性乳腺癌患者对化疗的敏感性及其靶病灶缓解吗？随机、对照、临床试验方案<br>版本号：1.1 版 版本日期：2017-2-24                                                                                                                       |        |                                                                                                       |
| 申办单位名称  | 辽宁省肿瘤医院                                                                                                                                                                                                           | 临床试验机构 | 辽宁省肿瘤医院                                                                                               |
| 研究者     | 孙涛                                                                                                                                                                                                                | 研究所在科室 | 内一科                                                                                                   |
| 审查日期    | 2017.3.1                                                                                                                                                                                                          | 审查地点   | 辽宁省肿瘤医院医学伦理委员会                                                                                        |
| 伦理审查方式  | <input type="checkbox"/> 会议审查 <input checked="" type="checkbox"/> 快速审查                                                                                                                                            |        |                                                                                                       |
| 审查文件    | 《知情同意》 1.1 版<br>《研究方案》 1.1 版                                                                                                                                                                                      |        |                                                                                                       |
| 审查意见    | 伦理委员会于 2017 年 3 月 1 日对上述内容进行了认真审查。伦理委员会认为该版本的《知情同意》更符合伦理要求，同意变更。                                                                                                                                                  |        |                                                                                                       |
| 其他意见或建议 | 无                                                                                                                                                                                                                 |        |                                                                                                       |
| 批件有效期   | 2017.3.1-2022.12.28                                                                                                                                                                                               | 跟踪审查频率 | <input type="checkbox"/> 3 个月 <input type="checkbox"/> 6 个月 <input checked="" type="checkbox"/> 12 个月 |
| 决议      | 同意<br>伦理委员会主任/授权者签字： 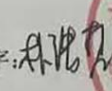<br>2017年 3 月 1 日<br> |        |                                                                                                       |

注：本伦理委员会的职责、人员组成、作用、操作程序及记录遵循 ICH-GCP 和中国的相关法律法规。

1. 临床研究人员签收：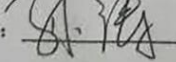 日期：2017.03.01
